# Supplementary material for: Odorant Receptor (Or) Genes: Polymorphism and Divergence in the D. melanogaster and D. pseudoobscura Lineages
Source: PubMed Central journal article supplement (PMC2954185; doi:10.1371/journal.pone.0013389), 2010-10-13
Supplement: pone.0013389.s001.pdf [file pone.0013389.s001.pdf]

**Table S1. Number of nucleotide positions**

| Species                 | Gene          | No. of sites <sup>a</sup> |      |       | Total |
|-------------------------|---------------|---------------------------|------|-------|-------|
|                         |               | nc (intron)               | s    | a     |       |
| <i>D. melanogaster</i>  | <i>Or63a</i>  | 937 (616)                 | 297  | 963   | 2197  |
|                         | <i>Or65a</i>  | 1054 (236)                | 282  | 969   | 2305  |
|                         | <i>Or65b</i>  | 219 (219)                 | 276  | 942   | 1437  |
|                         | <i>Or65c</i>  | 232 (232)                 | 283  | 947   | 1462  |
|                         | <i>Or67a</i>  | 1465 (190)                | 277  | 944   | 2686  |
|                         | <i>Or67b</i>  | 1094 (517)                | 285  | 978   | 2357  |
|                         | <i>Or67c</i>  | 1494 (174)                | 271  | 941   | 2706  |
|                         | <i>Or69a</i>  | 1676 (210)                | 481  | 1622  | 3779  |
|                         | Total         | 8171 (2394)               | 2452 | 8306  | 18928 |
| <i>D. pseudoobscura</i> | <i>Or63a</i>  | 364 (364)                 | 274  | 803   | 1444  |
|                         | <i>Or65b1</i> | 231 (231)                 | 278  | 868   | 1379  |
|                         | <i>Or65b2</i> | 224 (224)                 | 298  | 962   | 1484  |
|                         | <i>Or65b4</i> | 239 (160)                 | 268  | 857   | 1364  |
|                         | <i>Or65b5</i> | 793 (228)                 | 296  | 952   | 2041  |
|                         | <i>Or67a</i>  | 182 (182)                 | 297  | 966   | 1447  |
|                         | <i>Or67b</i>  | 912 (486)                 | 296  | 964   | 2172  |
|                         | <i>Or67c</i>  | 1366 (188)                | 293  | 925   | 2584  |
|                         | <i>Or69a</i>  | 3431 (206)                | 515  | 1642  | 5588  |
| Total                   | 7742 (2274)   | 2815                      | 8939 | 19503 |       |

nc, noncoding sites; s, synonymous sites; a, nonsynonymous sites. <sup>a</sup>

Excluding sites with alignment gaps.
