# Supplementary material for: Odorant Receptor (Or) Genes: Polymorphism and Divergence in the D. melanogaster and D. pseudoobscura Lineages
Source: PubMed Central journal article supplement (PMC2954185; doi:10.1371/journal.pone.0013389), 2010-10-13
Supplement: pone.0013389.s002.pdf [file pone.0013389.s002.pdf]

**Table S2. Genetic association**

| Species                 | Gene          | $R_M$ | $C_h$ | $C_{map}$ | $Z_{nS}$ |
|-------------------------|---------------|-------|-------|-----------|----------|
| <i>D. melanogaster</i>  | <i>Or63a</i>  | 10    | 0.005 | 0.06      | 0.20     |
|                         | <i>Or65a</i>  | 7     | 0.01  | 0.08      | 0.29     |
|                         | <i>Or65b</i>  | 1     | 0.000 | 0.08      | 0.66     |
|                         | <i>Or65c</i>  | 7     | 0.02  | 0.08      | 0.31     |
|                         | <i>Or67a</i>  | 8     | 0.003 | 0.07      | 0.21     |
|                         | <i>Or67b</i>  | 1     | 0.003 | 0.07      | 0.52     |
|                         | <i>Or67c</i>  | 4     | 0.001 | 0.06      | 0.33     |
|                         | <i>Or69a</i>  | 13    | 0.01  | 0.05      | 0.27     |
| <i>D. pseudoobscura</i> | <i>Or63a</i>  | 14    | 2.10  | 0.37      | 0.14     |
|                         | <i>Or65b1</i> | 11    | 0.09  | 0.37      | 0.20     |
|                         | <i>Or65b2</i> | 2     | 0.02  | 0.22      | 0.31     |
|                         | <i>Or65b4</i> | 3     | 0.00  | 0.22      | 0.42     |
|                         | <i>Or65b5</i> | 6     | 0.02  | 0.22      | 0.39     |
|                         | <i>Or67a</i>  | 11    | 0.06  | 0.33      | 0.22     |
|                         | <i>Or67b</i>  | 0     | 0.21  | 0.37      | 0.53     |
|                         | <i>Or67c</i>  | 11    | 1.18  | 0.30      | 0.15     |
| <i>Or69a</i>            | 2             | 0.09  | 0.30  | 0.15      |          |

$R_M$ , minimum number of recombination events in the history of the sample;  $C_h$ , recombination parameter per nucleotide according to (Hudson 1987);  $C_{map}$ , recombination parameter based on map distances.
